# Supplementary material
Source: Springer Nature journal article supplement (https://www.springermedizin.de/resource/supplementary/13063_2009_340_MOESM2_ESM.pdf/9618018)

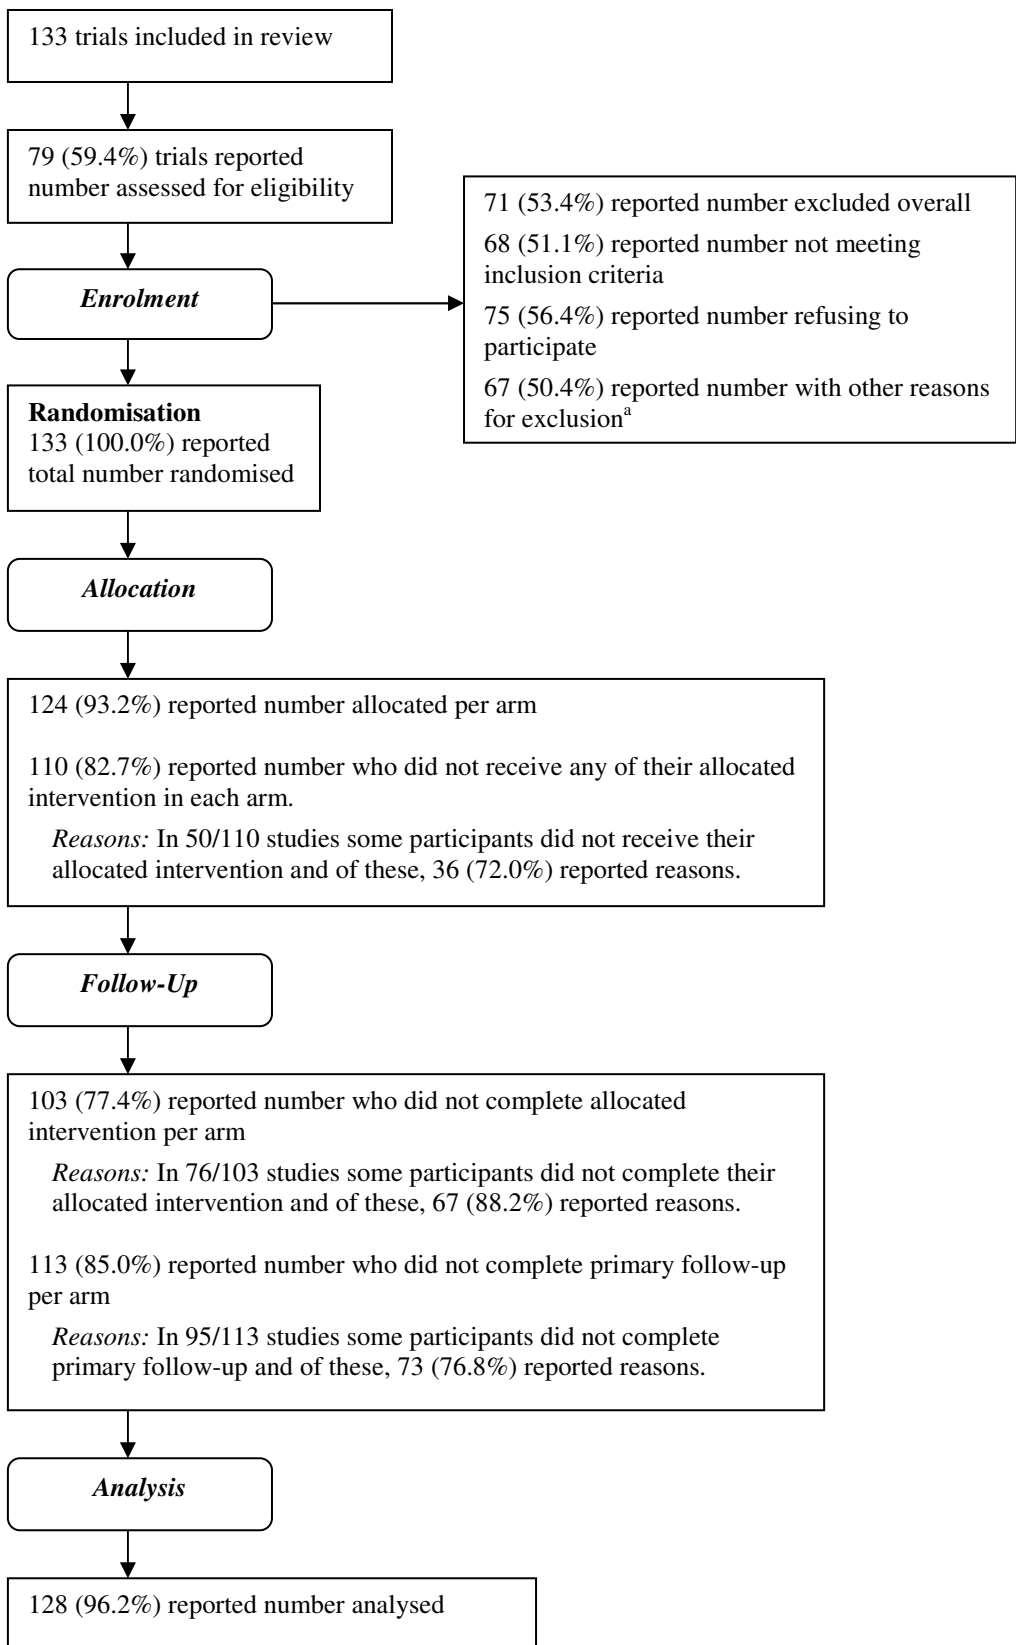

<sup>a</sup>For example, logistical reasons or refusal by patient's doctor to allow participation

Supplement: MOESM2 [file 9618018]
